# Supplementary material for: Mapping the performance of a versatile water-based condensation particle counter (vWCPC) with numerical simulation and experimental study
Source: Copernicus journal article supplement (doi:10.5194/amt-16-3973-2023), 2023-09-01
Supplement: Supplementary file 1 [file amt-16-3973-2023-supplement.pdf]

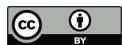

*Supplement of*

## **Mapping the performance of a versatile water-based condensation particle counter (vWCPC) with numerical simulation and experimental study**

**Weixing Hao et al.**

*Correspondence to:* Fan Mei (fan.mei@pnnl.gov) and Yang Wang (yangwang@miami.edu)

The copyright of individual parts of the supplement might differ from the article licence.

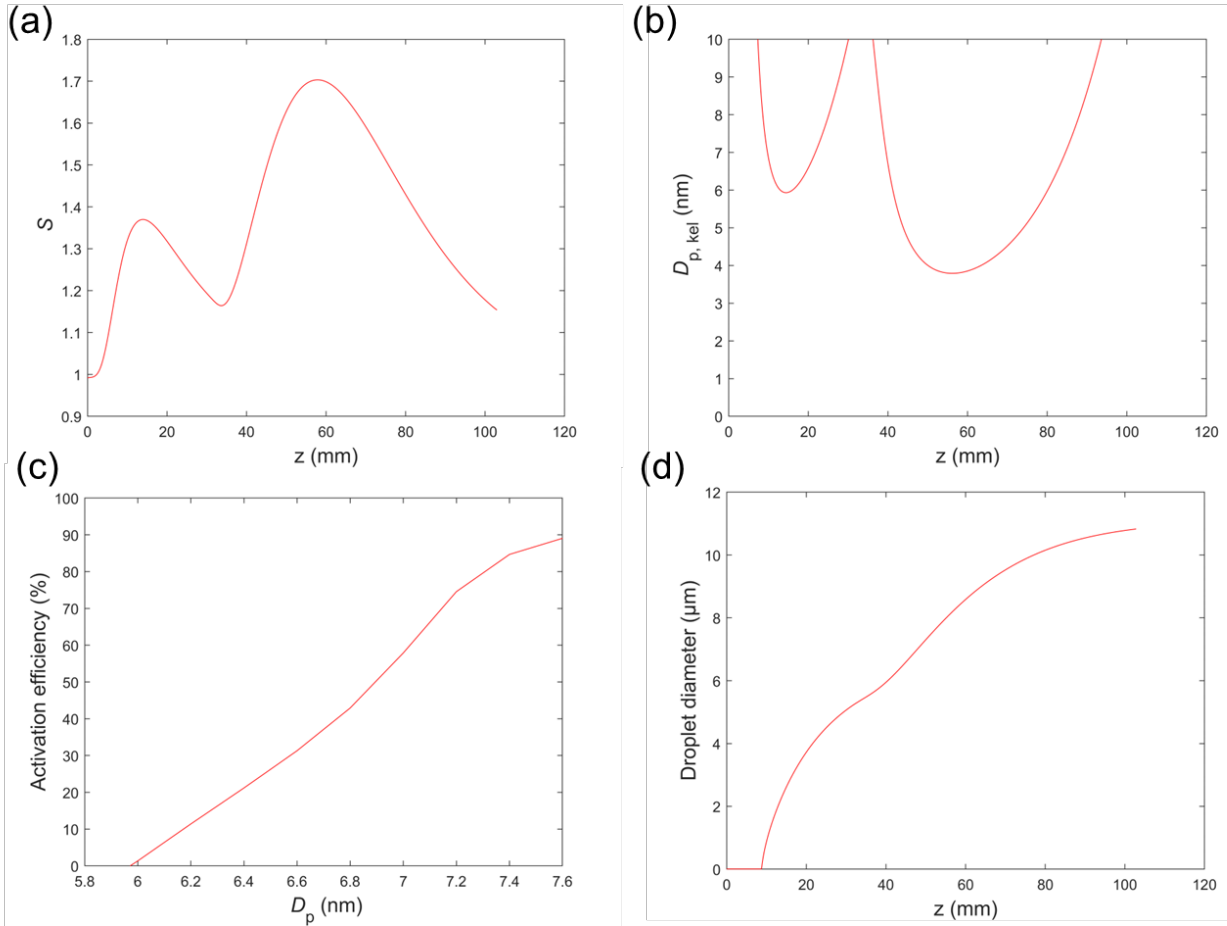

**Figure S1.** Evaluation of particle activation and droplet growth performance at the default temperature condition of  $T_{\text{con}} = 30\text{ }^{\circ}\text{C}$ ,  $T_{\text{ini}} = 59\text{ }^{\circ}\text{C}$ ,  $T_{\text{mod}} = 10\text{ }^{\circ}\text{C}$ . (a) saturation ratio ( $S$ ), (b) Kelvin equivalent size ( $D_{p, \text{kel}}$ ) as a function of distance along the axis centerline ( $r = 0$ ) of the tube, (c) activation efficiency as a function of particle diameter, and (d) droplet growth size as a function of distance along the axis of the tube. The condensational growth of 8 nm particles was simulated along the centerline ( $r = 0$ ).

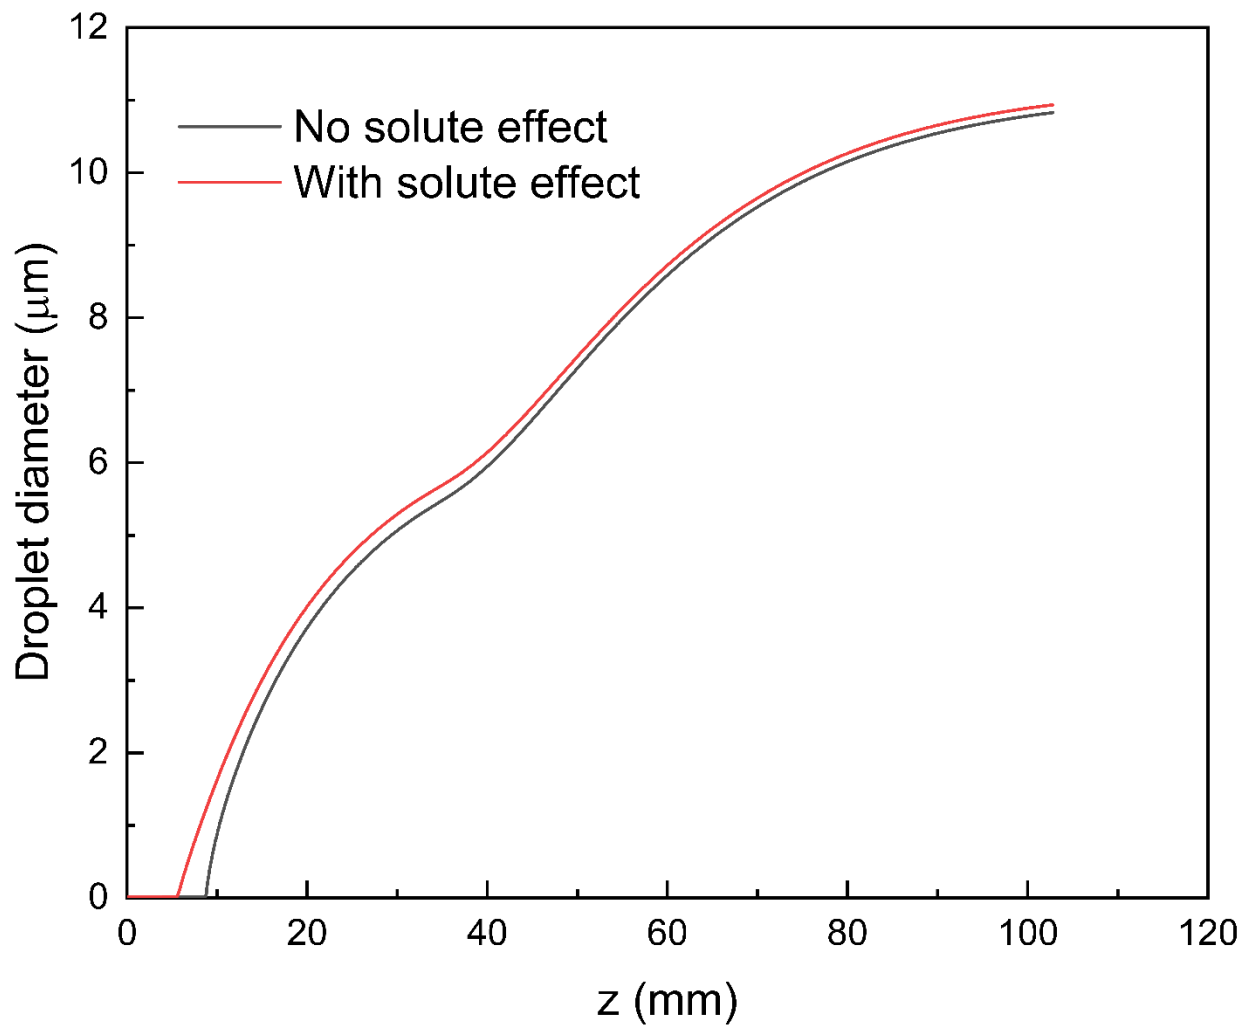

Figure S2. Comparison of with and without solute effect on the droplet growth size as a function of distance along the axis of the tube. The condensational growth of 8 nm particles was tested as seed particles.

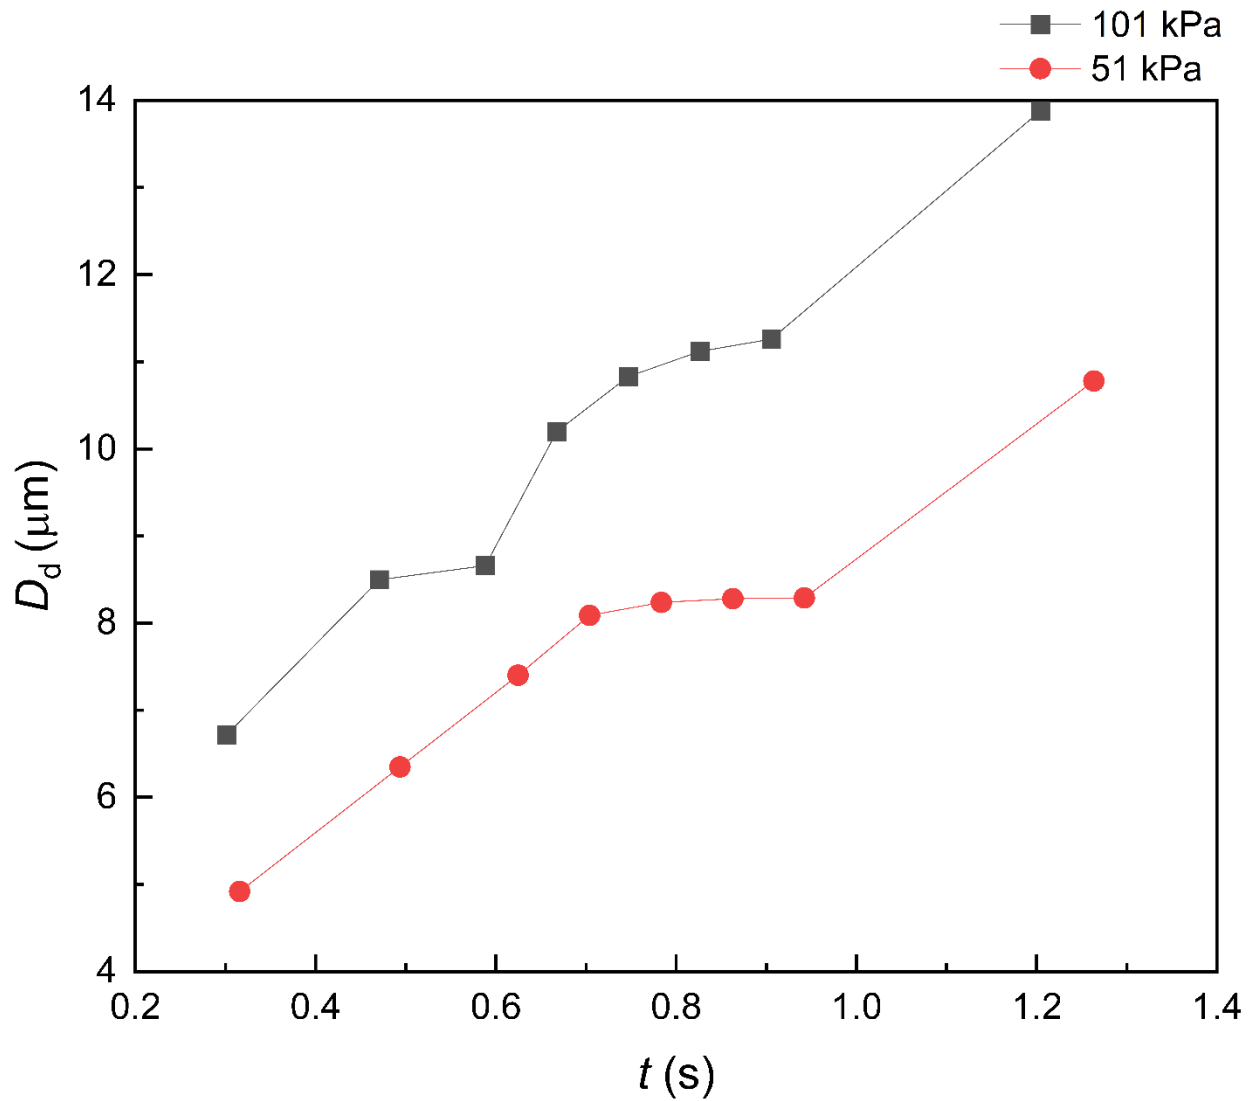

Figure S3. Effect of allowed particle growth time ( $t$ ) at the standard pressure and the reduced pressure of 51 kPa on final growth particle size at the outlet of moderator along the centerline ( $r = 0$ ),  $D_d$ . The condensational growth of 8 nm particles was tested as seed particles.
